# Supplementary material
Source: publisher figshare collection journal article supplement (https://asha.figshare.com/articles/dataset/_/6170312)
Supplement: Supplementary file 1 [file 1]

## Supplemental Materials 1. ACOM instructions and sample item.

### Instructions Page 1:

I am going to show you a number of everyday communication tasks.

Communication tasks are activities and situations that involve speaking and listening, reading and writing, and using numbers.

We want to know how effectively you perform these tasks.

"Effectively" means that

- **you accomplish what you want to**
- **without help**
- **and without taking too much time or effort.**

Your task will be to tell us how effectively you perform each task when you have the opportunity to try it.

To do this, you will use the rating scale shown on the next page:

### Instructions Page 2:

**You will rate how effectively you perform tasks using the following categories:**

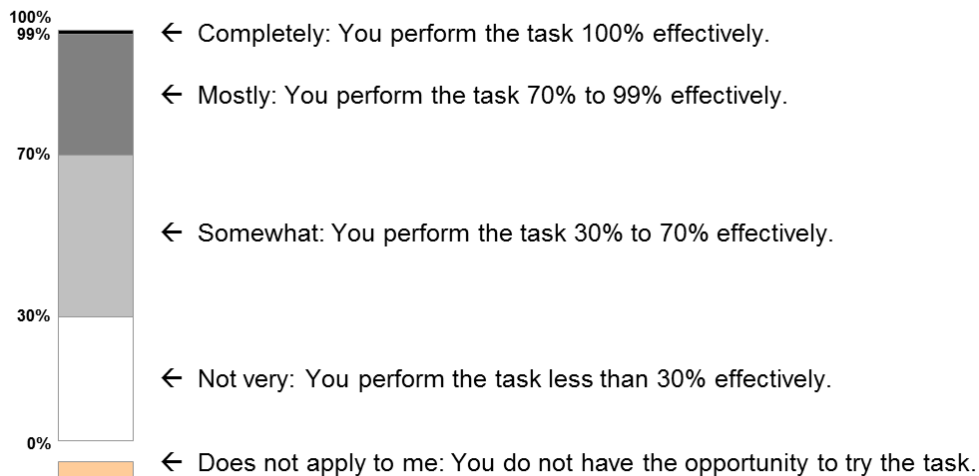

**Do you have any questions?**

Instructions Page 3:

**Whenever you answer "Does Not Apply", I will ask you the following question:**

**That's because**

- ☐ **Of my communication difficulties**
- ☐ **Of some other reason not related to my communication difficulties**

Example Item:

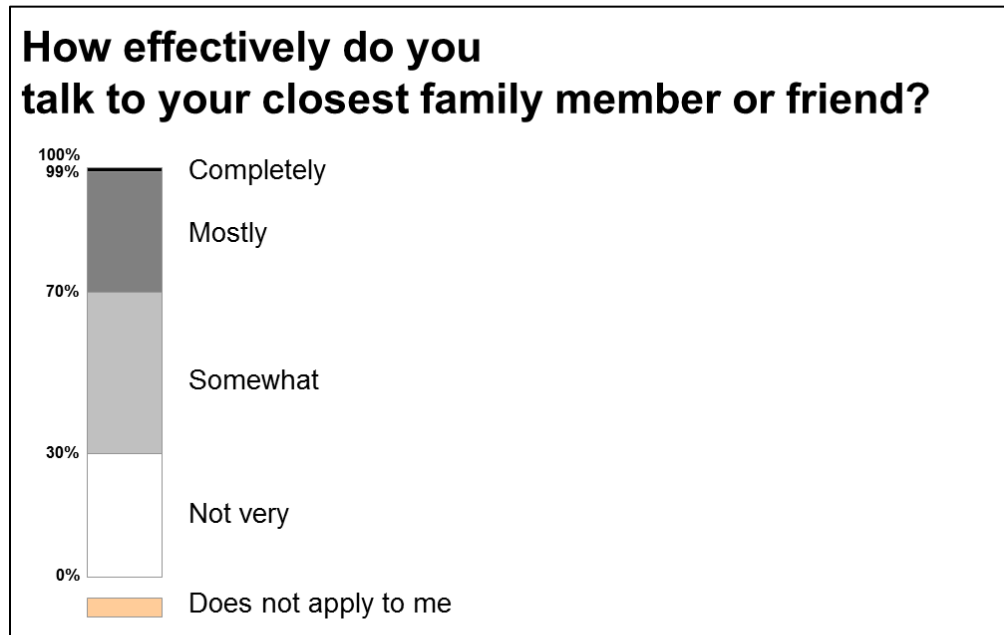

*Note.* ACOM = Aphasia Communication Outcome Measure.
