# Supplementary material
Source: publisher figshare collection journal article supplement (https://asha.figshare.com/articles/dataset/_/6170312)
Supplement: Supplementary file 2 [file 1]

### Supplemental Materials 3. Excluded items and reasons for exclusion.

| Item Content                                                          | Reason For Exclusion             |
|-----------------------------------------------------------------------|----------------------------------|
| read names on a ballot to vote                                        | > 10% "does not apply" responses |
| talk about politics                                                   | > 10% "does not apply" responses |
| talk to your minister, priest, or rabbi about things that concern you | > 10% "does not apply" responses |
| follow religious services                                             | > 10% "does not apply" responses |
| follow an instruction manual                                          | > 10% "does not apply" responses |
| read bus/train schedules                                              | > 10% "does not apply" responses |
| buy things on the internet                                            | > 10% "does not apply" responses |
| use a road map                                                        | > 10% "does not apply" responses |
| read grocery store coupons and flyers                                 | > 10% "does not apply" responses |
| order something over the phone                                        | > 10% "does not apply" responses |
| use an ATM machine                                                    | > 10% "does not apply" responses |
| contribute to class/business discussions                              | > 10% "does not apply" responses |
| have a conversation with coworkers/classmates at work or school       | > 10% "does not apply" responses |
| understand business/class discussions                                 | > 10% "does not apply" responses |
| follow written work procedures                                        | > 10% "does not apply" responses |
| make business calls                                                   | > 10% "does not apply" responses |
| understand work/school documents                                      | > 10% "does not apply" responses |
| take notes during meetings/classes                                    | > 10% "does not apply" responses |
| use the computer for work/school tasks                                | > 10% "does not apply" responses |
| write reports for work/school                                         | > 10% "does not apply" responses |
| pick out greeting cards for different occasions                       | > 10% "does not apply" responses |
| follow radio news programs                                            | > 10% "does not apply" responses |
| read a book for pleasure                                              | > 10% "does not apply" responses |
| talk about books that you have read                                   | > 10% "does not apply" responses |
| understand a TV schedule                                              | > 10% "does not apply" responses |
| get help in an emergency                                              | > 10% "does not apply" responses |
| discuss your medications with the pharmacist                          | > 10% "does not apply" responses |

---

|                                                                         |                                                                                                         |
|-------------------------------------------------------------------------|---------------------------------------------------------------------------------------------------------|
| look up a number in the telephone book                                  | > 10% "does not apply" responses                                                                        |
| give a speech to a group of people                                      | > 10% "does not apply" responses                                                                        |
| meet the communication needs of your job or school                      | > 10% "does not apply" responses                                                                        |
| get your point across when you are upset or angry                       | standardized loading < .3 on general factor                                                             |
| write a business letter                                                 | absolute correlation residuals > .2                                                                     |
| understand warning signs (e.g., slippery floor, don't enter)            | absolute correlation residuals > .2                                                                     |
| understand what the doctor tells you                                    | absolute correlation residuals > .2                                                                     |
| follow group conversation                                               | absolute correlation residuals > .2                                                                     |
| greet people appropriately (e.g., Hi, how are you?)                     | absolute correlation residuals > .2                                                                     |
| let people know if you understand them                                  | absolute correlation residuals > .2                                                                     |
| read words aloud                                                        | absolute correlation residuals > .2                                                                     |
| recognize your name in print                                            | absolute correlation residuals > .2                                                                     |
| ask for help from family or friends                                     | absolute correlation residuals > .2                                                                     |
| understand a fast-paced conversation                                    | absolute correlation residuals > .2                                                                     |
| understand conversation in a noisy place (e.g., party, crowd)           | absolute correlation residuals > .2                                                                     |
| write your name                                                         | absolute correlation residuals > .2                                                                     |
| write your social security number                                       | absolute correlation residuals > .2                                                                     |
| communicate your basic needs (hunger, restroom, pain, discomfort, etc.) | absolute correlation residuals > .2                                                                     |
| understand people when you are stressed or under pressure               | absolute correlation residuals > .2                                                                     |
| call friends by name                                                    | close similarity in item content with "call family members by name," leading to bloated specific factor |
| introduce family members by name                                        | close similarity in item content with "introduce friends by name," leading to bloated specific factor   |
| recognize when people do not understand you                             | standardized loading < .3 on general factor                                                             |
| talk on the telephone                                                   | absolute correlation residuals > .2                                                                     |
| understand restroom signs                                               | high average (root-mean-square) correlation residuals                                                   |
| follow conversation about unfamiliar topics                             | high average (root-mean-square) correlation residuals                                                   |
| tell time                                                               | high average (root-mean-square) correlation residuals                                                   |
| follow movies                                                           | absolute standardized residuals from maximum likelihood solution > 2                                    |
| use a computer at home—                                                 | differential item functioning by age (–)                                                                |

---

|                                                               |                                                                                                                           |
|---------------------------------------------------------------|---------------------------------------------------------------------------------------------------------------------------|
| use cash to buy things                                        | differential item functioning by age (–)                                                                                  |
| understand computer icons                                     | differential item functioning by age (–)                                                                                  |
| ask for clarification when you do not understand something    | differential item functioning by age (–)                                                                                  |
| express agreement or disagreement                             | differential item functioning by age (–)                                                                                  |
| tell people what you like and dislike                         | differential item functioning by age (–) and veteran status (+)                                                           |
| ask for information over the phone                            | differential item functioning by age (–), aphasia severity (+), veteran status (–), and self-reported vision function (+) |
| understand popular sayings (e.g., It's raining cats and dogs) | differential item functioning by age (+)                                                                                  |
| follow spoken directions                                      | differential item functioning by age (+)                                                                                  |
| talk about current events that you are familiar with          | differential item functioning by age (+) and gender (–)                                                                   |
| buy things at a store                                         | differential item functioning by aphasia severity (–)                                                                     |
| communicate at family gatherings                              | differential item functioning by aphasia severity (–)                                                                     |
| recognize the names of family members when someone says them  | differential item functioning by aphasia severity (–)                                                                     |
| have a conversation with family and friends                   | differential item functioning by aphasia severity (–)                                                                     |
| follow TV shows                                               | differential item functioning by aphasia severity (–)                                                                     |
| write down a phone message                                    | differential item functioning by aphasia severity (–)                                                                     |
| use a credit/debit card to buy things                         | differential item functioning by aphasia severity (+)                                                                     |
| talk about your past (e.g., childhood, life experiences)      | differential item functioning by aphasia severity (+)                                                                     |
| understand someone you don't know                             | differential item functioning by aphasia severity (+)                                                                     |
| use the internet to get information                           | differential item functioning by aphasia severity (+) and age (–)                                                         |
| speak to family members and friends on the phone              | differential item functioning by aphasia severity (+) and gender (+)                                                      |
| manage your personal finances                                 | differential item functioning by gender (–)                                                                               |
| pay bills                                                     | differential item functioning by gender (–)                                                                               |
| say your social security number                               | differential item functioning by gender (–) and time post-onset (–)                                                       |
| say what day of the week it is                                | differential item functioning by gender (–) and self-reported hand function (+)                                           |
| follow TV news programs                                       | differential item functioning by gender (–) and aphasia severity (–)                                                      |
| follow driving directions                                     | differential item functioning by gender (–) and self-reported hand function (+)                                           |
| make transactions with a bank teller                          | differential item functioning by gender (–) and time post-onset (+)                                                       |
| add and subtract                                              | differential item functioning by gender (–), age (+), and aphasia severity (–)                                            |
| dial a telephone number                                       | differential item functioning by gender (+)                                                                               |

---

|                                                                  |                                                                                                 |
|------------------------------------------------------------------|-------------------------------------------------------------------------------------------------|
| recognize the names of common objects when someone says them     | differential item functioning by gender (+)                                                     |
| use a calendar to plan and keep track of events                  | differential item functioning by gender (+) and self-reported hearing function (–)              |
| understand legal documents, such as a will or advanced directive | differential item functioning by lesion site and number (–)                                     |
| make appointments on the phone                                   | differential item functioning by lesion site and number (–)                                     |
| ask questions to get information                                 | differential item functioning by lesion site and number (+)                                     |
| follow simple written instructions                               | differential item functioning by motor speech diagnosis (–) and gender (+)                      |
| tell people how you feel                                         | differential item functioning by motor speech diagnosis (–) time post-onset (+)                 |
| spell your whole name out loud                                   | differential item functioning by motor speech diagnosis (+)                                     |
| make small talk with neighbors                                   | differential item functioning by motor speech diagnosis (+) and aphasia severity (–)            |
| talk to someone you don't know                                   | differential item functioning by motor speech diagnosis (+) and self-reported hand function (–) |
| understand a single written word                                 | differential item functioning by self-reported hand (+) and hearing function (–)                |
| write a shopping list                                            | differential item functioning by self-reported hand function (+)                                |
| write checks                                                     | differential item functioning by self-reported hand function (+)                                |
| talk about your hobbies and interests                            | differential item functioning by self-reported hand function (+)                                |
| say "thank you" and "you're welcome"                             | differential item functioning by self-reported hand function (+)                                |
| communicate by e-mail                                            | differential item functioning by self-reported hearing (+) and vision (+) function              |
| recognize your address when someone says it                      | differential item functioning by self-reported hearing function (–)                             |
| read sentences aloud                                             | differential item functioning by self-reported hearing function (–)                             |
| respond to greetings                                             | differential item functioning by self-reported hearing function (–)                             |
| count change at the store                                        | differential item functioning by self-reported hearing function (–) and aphasia severity (+)    |
| understand price tags                                            | differential item functioning by self-reported vision function (–)                              |
| follow spoken instructions                                       | differential item functioning by self-reported vision function (–)                              |
| answer questions about yourself                                  | differential item functioning by self-reported vision function (–)                              |
| say what month it is                                             | differential item functioning by self-reported vision function (–)                              |
| talk if you are stressed or under pressure                       | differential item functioning by self-reported vision function (–)                              |
| introduce friends by name                                        | differential item functioning by time post-onset (–)                                            |
| write simple messages                                            | differential item functioning by time post-onset (–)                                            |
| write sentences                                                  | differential item functioning by time post-onset (–)                                            |

---

---

|                                          |                                                                                                               |
|------------------------------------------|---------------------------------------------------------------------------------------------------------------|
| write words                              | differential item functioning by time post-onset (–) and aphasia severity (–)                                 |
| order food in a restaurant               | differential item functioning by time post-onset (+) and self-reported hearing function (+)                   |
| say your phone number                    | differential item functioning by veteran status (–)                                                           |
| recognize your name when called          | differential item functioning by veteran status (–)                                                           |
| understand medical insurance information | differential item functioning by veteran status (+) and self-reported vision function (–)                     |
| understand jokes and funny stories       | differential item functioning by veteran status (+), time post-onset (–), and self-reported hand function (–) |

---
