# Supplementary material
Source: publisher figshare collection journal article supplement (https://asha.figshare.com/articles/dataset/_/6170312)
Supplement: Supplementary file 3 [file 1]

**Supplemental Materials 5.** IRT-graded response model parameters for the 59-item ACOM. Bifactor graded response model item parameters and standard errors. Where a category threshold is missing, it indicates that the adjacent categories separated by that threshold were collapsed due to infrequent usage.

| Item Content                                              | General Factor Discrimination | Category thresholds  |                      |                      |
|-----------------------------------------------------------|-------------------------------|----------------------|----------------------|----------------------|
|                                                           | <i>a</i>                      | <i>b<sub>1</sub></i> | <i>b<sub>2</sub></i> | <i>b<sub>3</sub></i> |
| fill out simple forms                                     | 2.73 (0.32)                   | −0.74 (0.12)         | 0.01 (0.10)          | 1.52 (0.16)          |
| say the names of common objects (e.g., bed, lamp, pencil) | 2.63 (0.36)                   | −2.05 (0.19)         | −0.8 (0.11)          | 1.11 (0.13)          |
| say the names of body parts                               | 2.51 (0.23)                   | −1.53 (0.14)         | −0.55 (0.10)         | 1.23 (0.12)          |
| say the names of food items                               | 2.47 (0.22)                   | −1.51 (0.14)         | −0.39 (0.09)         | 1.42 (0.13)          |
| write your phone number (2-3)                             | 2.44 (0.32)                   | −0.84 (0.13)         |                      | 0.94 (0.14)          |
| write your address                                        | 2.36 (0.29)                   | −1.17 (0.16)         |                      | 0.98 (0.15)          |
| tell a story                                              | 2.23 (0.22)                   | −0.67 (0.11)         | 0.77 (0.11)          |                      |
| say the names of clothing items                           | 2.23 (0.20)                   | −1.93 (0.18)         | −0.58 (0.10)         | 1.16 (0.13)          |
| start a new topic in conversation                         | 2.22 (0.25)                   | −1.05 (0.15)         | 0.46 (0.12)          |                      |
| ask for information from store employees                  | 2.20 (0.20)                   | −0.92 (0.11)         | −0.01 (0.09)         | 1.7 (0.16)           |
| have a conversation with strangers                        | 2.19 (0.23)                   | −0.94 (0.12)         | 0.42 (0.10)          |                      |
| talk about current/previous work                          | 2.12 (0.19)                   | −1.03 (0.12)         | −0.05 (0.09)         | 1.8 (0.16)           |
| leave a message on an answering machine                   | 2.11 (0.20)                   | −0.41 (0.10)         |                      | 1.93 (0.18)          |
| talk to your closest family member or friend              | 2.08 (0.20)                   |                      | −1.11 (0.12)         | 1.45 (0.14)          |
| write a simple "to do" list                               | 2.03 (0.24)                   | −0.67 (0.14)         | 0.18 (0.12)          | 1.8 (0.22)           |
| keep a conversation going                                 | 2.02 (0.20)                   | −1.04 (0.13)         | 0.40 (0.11)          | 2.32 (0.23)          |
| say your name                                             | 2.00 (0.20)                   |                      | −1.53 (0.15)         | 0.01 (0.09)          |
| make yourself understood when you speak with strangers    | 1.95 (0.20)                   | −1.16 (0.14)         | 0.29 (0.10)          |                      |
| talk about your future plans with family or friends       | 1.93 (0.17)                   | −1.96 (0.18)         | −0.46 (0.10)         | 1.82 (0.17)          |
| introduce yourself                                        | 1.91 (0.17)                   | −1.67 (0.16)         | −0.74 (0.11)         | 1.23 (0.13)          |
| tell a joke                                               | 1.91 (0.22)                   | −0.25 (0.11)         | 0.86 (0.13)          |                      |
| find the words you want to say during conversation        | 1.90 (0.19)                   | −1.03 (0.13)         | 0.7 (0.11)           |                      |
| talk about your day with family or friends                | 1.88 (0.16)                   | −1.75 (0.17)         | −0.58 (0.11)         | 1.88 (0.18)          |
| explain how to do something                               | 1.83 (0.19)                   | −1.17 (0.15)         | 0.46 (0.11)          |                      |
| read product labels                                       | 1.81 (0.22)                   | −2.13 (0.28)         | −0.61 (0.15)         | 1.86 (0.25)          |
| read signs in a store to find what you need               | 1.78 (0.20)                   | −2.26 (0.26)         | −1.24 (0.17)         | 1.26 (0.17)          |

|                                                                       |             |              |              |             |
|-----------------------------------------------------------------------|-------------|--------------|--------------|-------------|
| call family members by name                                           | 1.78 (0.16) | -2.00 (0.19) | -0.81 (0.12) | 0.89 (0.12) |
| explain your health concerns to your doctor                           | 1.74 (0.16) | -1.55 (0.16) | -0.51 (0.11) | 1.88 (0.18) |
| talk with a group of people                                           | 1.73 (0.19) | -1.15 (0.15) | 0.37 (0.11)  |             |
| talk about your health concerns with family members                   | 1.71 (0.19) |              | -0.49 (0.11) | 1.78 (0.19) |
| correct yourself when people do not understand you                    | 1.71 (0.18) | -1.87 (0.20) | -0.19 (0.11) |             |
| share opinions                                                        | 1.70 (0.18) | -1.84 (0.21) | -0.11 (0.11) |             |
| fill out complex forms                                                | 1.68 (0.22) | 0.24 (0.12)  | 1.69 (0.21)  |             |
| follow conversation about familiar topics                             | 1.64 (0.17) |              | -1.14 (0.14) | 1.69 (0.18) |
| make yourself understood when you speak with family or friends        | 1.63 (0.14) | -2.21 (0.22) | -0.45 (0.11) | 2.36 (0.23) |
| write a personal letter                                               | 1.62 (0.38) | 0.62 (0.18)  |              |             |
| talk about movies that you have seen                                  | 1.59 (0.17) | -1.25 (0.16) | 0.17 (0.11)  |             |
| write messages in greeting cards                                      | 1.59 (0.21) | -0.77 (0.16) |              | 2.50 (0.32) |
| understand magazine/newspaper articles                                | 1.56 (0.16) | -1.63 (0.21) | -0.17 (0.12) | 2.20 (0.25) |
| understand your bank/credit card statements                           | 1.53 (0.20) |              | -0.61 (0.15) | 1.48 (0.21) |
| correct mistakes you make when you talk                               | 1.5 (0.160) | -1.78 (0.21) | -0.10 (0.11) |             |
| understand your closest family member or friend when they talk to you | 1.49 (0.16) |              | -1.66 (0.19) | 1.21 (0.15) |
| understand newspaper headlines                                        | 1.47 (0.16) | -2.47 (0.30) | -1.14 (0.17) | 1.45 (0.20) |
| understand medicine labels                                            | 1.43 (0.18) |              | -0.68 (0.15) | 1.56 (0.22) |
| tell people why you can't talk very well                              | 1.34 (0.13) | -1.90 (0.21) | -0.49 (0.12) | 2.11 (0.23) |
| make your wants and needs known                                       | 1.34 (0.14) |              | -1.13 (0.15) | 1.87 (0.21) |
| read food labels                                                      | 1.28 (0.16) | -2.57 (0.35) | -1.01 (0.19) | 1.81 (0.26) |
| answer yes/no questions                                               | 1.26 (0.15) |              | -1.91 (0.23) | 1.12 (0.17) |
| read traffic signs                                                    | 1.26 (0.16) |              | -1.85 (0.27) | 0.85 (0.17) |
| understand humor in pictures (e.g., comics, photographs)              | 1.19 (0.16) |              | -1.62 (0.24) | 1.62 (0.24) |
| follow therapy instructions                                           | 1.13 (0.14) |              | -1.39 (0.21) | 1.87 (0.26) |

*Note.* IRT = item response theory; ACOM = Aphasia Communication Outcome Measure.
