# Supplementary material
Source: publisher figshare collection journal article supplement (https://asha.figshare.com/articles/dataset/_/6170312)
Supplement: Supplementary file 5 [file 1]

**Supplemental Materials 4.** Standardized factor loadings,  $\lambda$ , and standard errors for the 59 ACOM items retained in the final modified bifactor model.

| Item Content                                                   | General Factor | Local factors |             |               |             |
|----------------------------------------------------------------|----------------|---------------|-------------|---------------|-------------|
|                                                                |                | Writing       | Talking     | Comprehension | Naming      |
| say the names of body parts                                    | 0.78 (0.03)    |               |             |               | 0.32 (0.06) |
| say the names of food items                                    | 0.78 (0.03)    |               |             |               | 0.31 (0.06) |
| talk about current/previous work                               | 0.78 (0.03)    |               |             |               |             |
| ask for information from store employees                       | 0.78 (0.03)    |               | 0.20 (0.04) |               |             |
| talk to your closest family member or friend                   | 0.77 (0.03)    |               |             |               |             |
| say your address                                               | 0.77 (0.03)    | 0.23 (0.05)   |             |               |             |
| leave a message on an answering machine                        | 0.77 (0.03)    |               | 0.18 (0.06) |               |             |
| talk about your future plans with family or friends            | 0.75 (0.03)    |               |             |               |             |
| introduce yourself                                             | 0.75 (0.03)    |               |             |               |             |
| say your name                                                  | 0.75 (0.03)    |               |             |               | 0.20 (0.08) |
| say the names of clothing items                                | 0.74 (0.03)    |               |             |               | 0.35 (0.06) |
| discuss family matters with your spouse and children           | 0.74 (0.03)    |               |             |               |             |
| tell a story                                                   | 0.74 (0.03)    |               | 0.37 (0.05) |               |             |
| have a conversation with strangers                             | 0.73 (0.03)    |               | 0.37 (0.05) |               |             |
| talk about your day with family or friends                     | 0.73 (0.03)    |               | 0.19 (0.05) |               |             |
| say the names of common objects (e.g., bed, lamp, pencil)      | 0.72 (0.03)    |               |             |               | 0.52 (0.06) |
| explain your health concerns to your doctor                    | 0.71 (0.03)    |               | 0.12 (0.05) |               |             |
| talk about your health concerns with family members            | 0.71 (0.04)    |               |             |               |             |
| call family members by name                                    | 0.71 (0.03)    |               |             |               | 0.20 (0.07) |
| find the words you want to say during conversation             | 0.70 (0.04)    |               | 0.33 (0.05) |               |             |
| make yourself understood when you speak with strangers         | 0.70 (0.04)    |               | 0.36 (0.05) |               |             |
| fill out simple forms                                          | 0.69 (0.04)    | 0.58 (0.04)   |             |               |             |
| tell people about yourself                                     | 0.69 (0.04)    |               | 0.39 (0.05) |               |             |
| tell a joke                                                    | 0.69 (0.04)    |               | 0.38 (0.06) |               |             |
| keep a conversation going                                      | 0.69 (0.04)    |               | 0.43 (0.04) |               |             |
| explain how to get somewhere                                   | 0.68 (0.04)    |               | 0.24 (0.06) |               |             |
| make yourself understood when you speak with family or friends | 0.68 (0.03)    |               | 0.20 (0.05) |               |             |
| start a conversation with other people                         | 0.68 (0.03)    |               | 0.46 (0.04) |               |             |
| correct yourself when people do not understand you             | 0.67 (0.04)    |               | 0.32 (0.06) |               |             |

|                                                                       |             |             |             |
|-----------------------------------------------------------------------|-------------|-------------|-------------|
| explain how to do something                                           | 0.67 (0.04) | 0.41 (0.06) |             |
| follow conversation about familiar topics                             | 0.66 (0.04) |             | 0.30 (0.06) |
| talk about movies that you have seen                                  | 0.66 (0.04) | 0.24 (0.06) |             |
| follow simple spoken requests (e.g., pass the salt)                   | 0.65 (0.04) |             | 0.38 (0.05) |
| start a new topic in conversation                                     | 0.65 (0.04) | 0.58 (0.05) |             |
| write your phone number                                               | 0.64 (0.04) | 0.62 (0.04) |             |
| share opinions                                                        | 0.64 (0.04) | 0.41 (0.06) |             |
| talk with a group of people                                           | 0.64 (0.04) | 0.44 (0.05) |             |
| understand your closest family member or friend when they talk to you | 0.64 (0.04) |             | 0.24 (0.06) |
| fill out complex forms                                                | 0.63 (0.05) | 0.45 (0.06) |             |
| correct mistakes you make when you talk                               | 0.63 (0.04) | 0.32 (0.06) |             |
| write a simple "to do" list                                           | 0.62 (0.04) | 0.59 (0.05) |             |
| tell people why you can't talk very well                              | 0.62 (0.04) |             |             |
| make your wants and needs known                                       | 0.62 (0.04) |             |             |
| write your address                                                    | 0.62 (0.04) | 0.65 (0.04) |             |
| read signs in a store to find what you need                           | 0.59 (0.04) | 0.25 (0.06) | 0.52 (0.04) |
| understand magazine/newspaper articles                                | 0.58 (0.04) | 0.29 (0.06) | 0.44 (0.05) |
| answer yes/no questions                                               | 0.57 (0.05) |             | 0.28 (0.06) |
| write messages in greeting cards                                      | 0.57 (0.05) | 0.55 (0.05) |             |
| understand your bank/credit card statements                           | 0.57 (0.05) | 0.33 (0.06) | 0.42 (0.05) |
| understand newspaper headlines                                        | 0.56 (0.04) | 0.26 (0.07) | 0.46 (0.05) |
| read street name signs                                                | 0.55 (0.05) | 0.31 (0.06) | 0.52 (0.04) |
| understand medicine labels                                            | 0.54 (0.05) | 0.33 (0.06) | 0.43 (0.05) |
| follow therapy instructions                                           | 0.53 (0.05) |             | 0.31 (0.07) |
| read product labels                                                   | 0.52 (0.05) | 0.39 (0.06) | 0.58 (0.04) |
| follow a story someone tells                                          | 0.51 (0.05) |             | 0.44 (0.06) |
| read traffic signs                                                    | 0.50 (0.05) | 0.29 (0.06) | 0.47 (0.05) |
| read food labels                                                      | 0.49 (0.05) | 0.31 (0.06) | 0.48 (0.04) |
| understand humor in pictures (e.g., comics, photographs)              | 0.49 (0.05) |             | 0.51 (0.05) |
| write a personal letter                                               | 0.47 (0.07) | 0.60 (0.06) | 0.41 (0.08) |

Note. ACOM = Aphasia Communication Outcome Measure.
